# Supplementary material for: F-doped NiOOH derived from progressive reconstruction for efficient and durable water oxidation
Source: Royal Society of Chemistry journal article supplement (doi:10.1039/d3qi02619a), 2024-01-01
Supplement: d3qi02619a1.pdf [file d3qi02619a1.pdf]

## Supporting Information

# **F-doped NiOOH Derived from Progressive Reconstruction for Efficient and Durable Water Oxidation**

Kailu Guo,<sup>a</sup> Jinzhi Jia,<sup>b</sup> Xiaoyan Lu,<sup>a</sup> Shuang Wang,<sup>a</sup> Huijiao Wang,<sup>b</sup> Haixia Wu,<sup>a,\*</sup>  
Cailing Xu<sup>b,\*</sup>

<sup>a</sup> *Henan Key Laboratory of Function-Oriented Porous Materials, College of Chemistry and  
Chemical Engineering, Luoyang Normal University, Luoyang 471934, China*

<sup>b</sup> *State Key Laboratory of Applied Organic Chemistry, Laboratory of Special Function Materials  
and Structure Design of the Ministry of Education, College of Chemistry and Chemical  
Engineering, Lanzhou University, Lanzhou 730000, China*

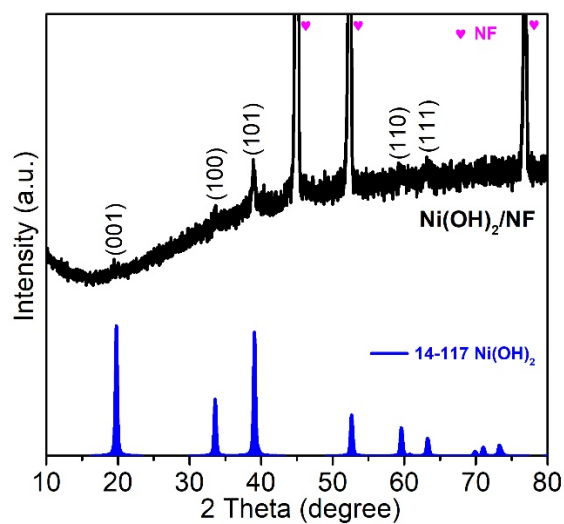

**Figure S1.** XRD pattern of the as-synthesized Ni(OH)<sub>2</sub>/NF.

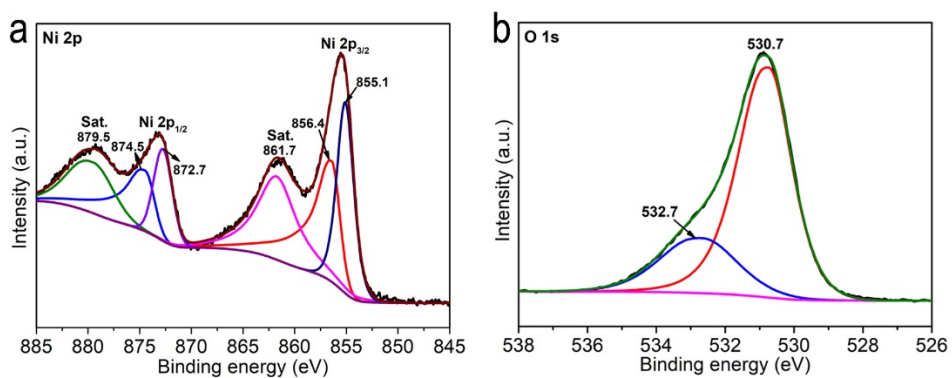

**Figure S2.** (a) Ni 2p and (b) O 1s XPS spectra of the as-synthesized Ni(OH)<sub>2</sub>/NF.

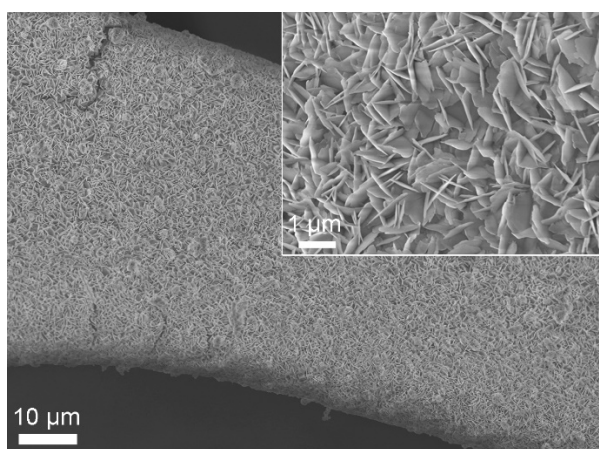

**Figure S3.** SEM image of the as-synthesized Ni(OH)<sub>2</sub>/NF.

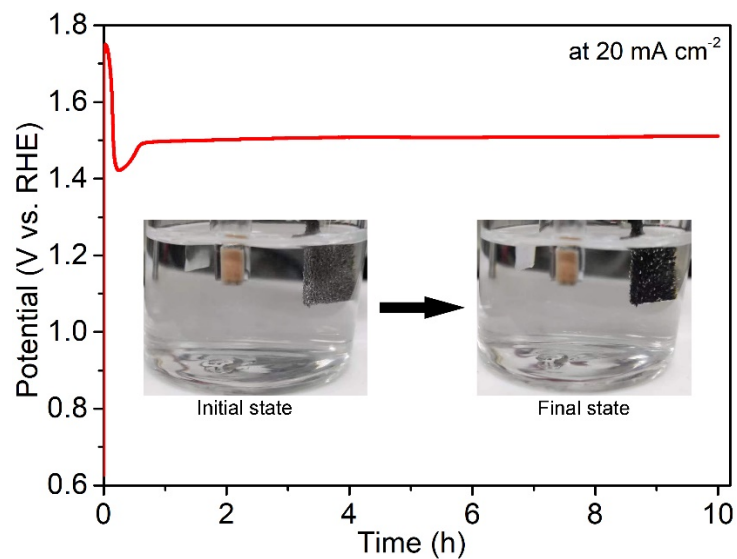

**Figure S4.** Chronopotentiometry activation of  $\text{NH}_4\text{NiF}_3/\text{NF}$  at a fixed current density of 20 mA  $\text{cm}^{-2}$  in 1 M KOH at room temperature. Inset is the pictures of electrolyte in this process.

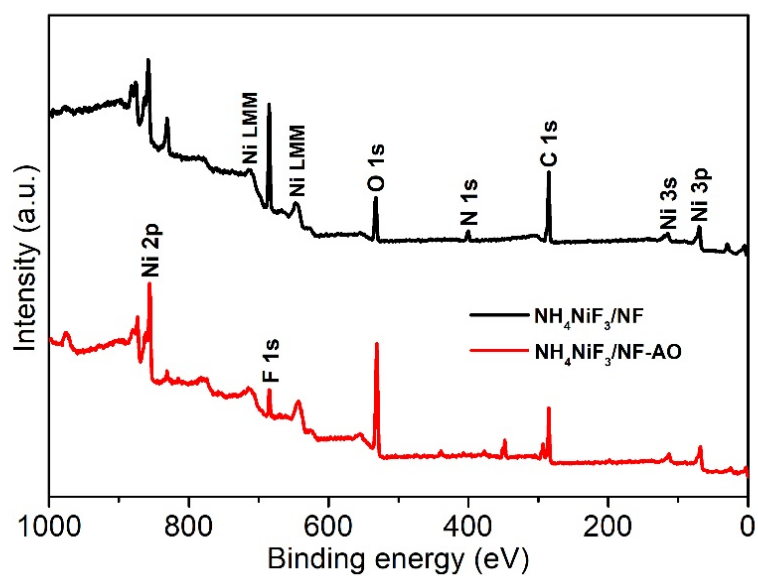

**Figure S5.** The full XPS spectra of  $\text{NH}_4\text{NiF}_3/\text{NF}$  and  $\text{NH}_4\text{NiF}_3/\text{NF-AO}$ .

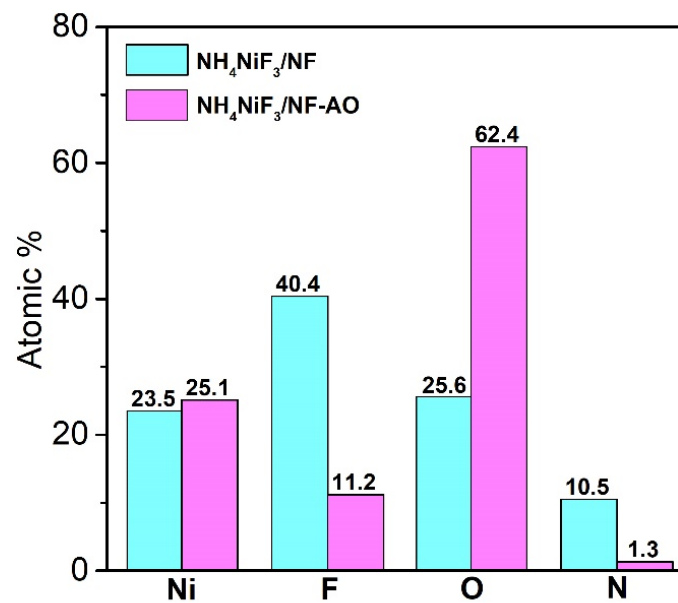

**Figure S6.** Semi-quantitative analysis based on the XPS spectra.

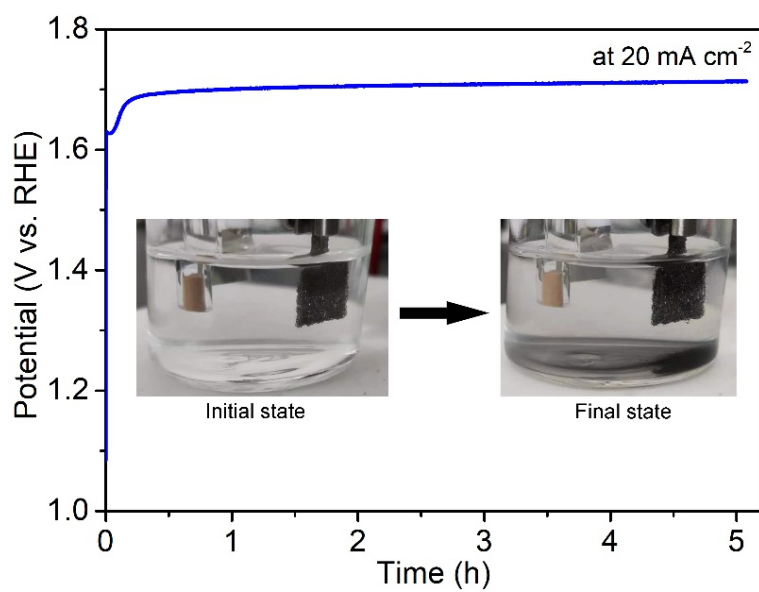

**Figure S7.** CP activation of Ni(OH)<sub>2</sub>/NF at a fixed current density of 20 mA cm<sup>-2</sup> in 1 M KOH.

Inset is the pictures of electrolyte in this process.

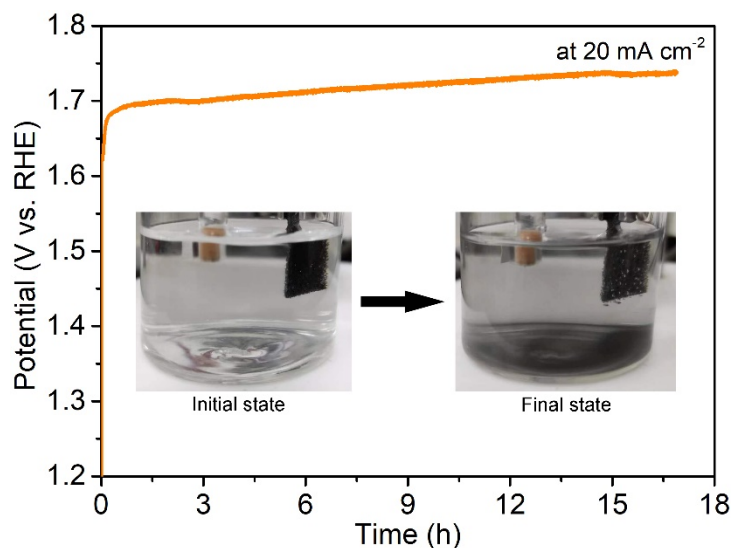

**Figure S8.** CP activation of  $\text{Ni}(\text{OH})_2/\text{NF}$  at a fixed current density of  $20 \text{ mA cm}^{-2}$  in  $1 \text{ M KOH} + 0.1 \text{ M KF}$ . Inset is the pictures of electrolyte in this process.

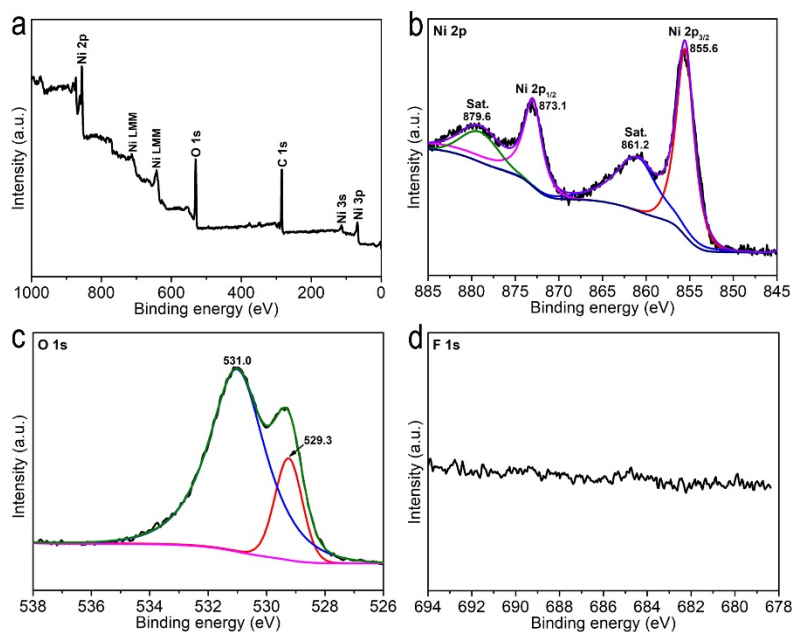

**Figure S9.** (a) Full XPS spectrum of the activated  $\text{Ni}(\text{OH})_2/\text{NF}$  in  $1 \text{ M KOH} + 0.1 \text{ M KF}$ . The corresponding high-resolution XPS spectra of (b) Ni 2p, (c) O 1s, and (d) F 1s.

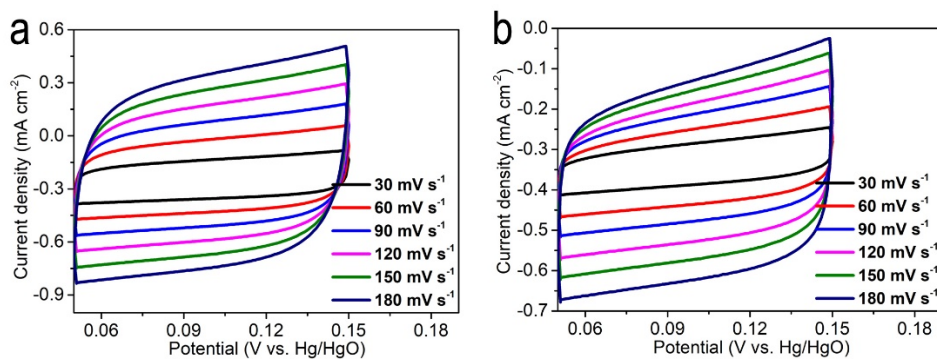

**Figure S10.** CV curves of (a) Ni(OH)<sub>2</sub>/NF, and (b) NH<sub>4</sub>NiF<sub>3</sub>/NF-AO with different scan rates in 1 M KOH.

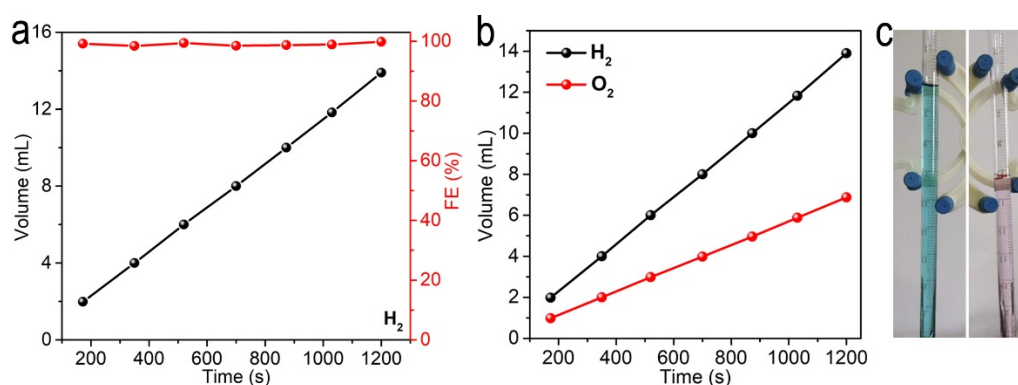

**Figure S11.** (a) The volume of H<sub>2</sub> as a function of time collected from the surface of Pt plate and the corresponding FE. (b) The volume of H<sub>2</sub> and O<sub>2</sub> collected from the surface of Pt plate and NH<sub>4</sub>NiF<sub>3</sub>/NF-AO respectively. (c) The picture of gas collection device.

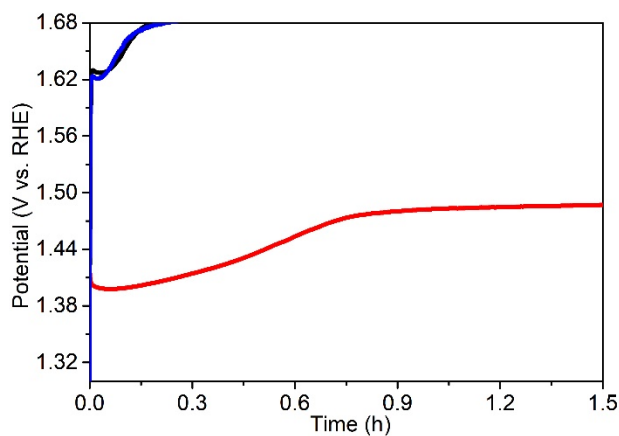

**Figure S12.** Partially enlarged image of Figure 4a.

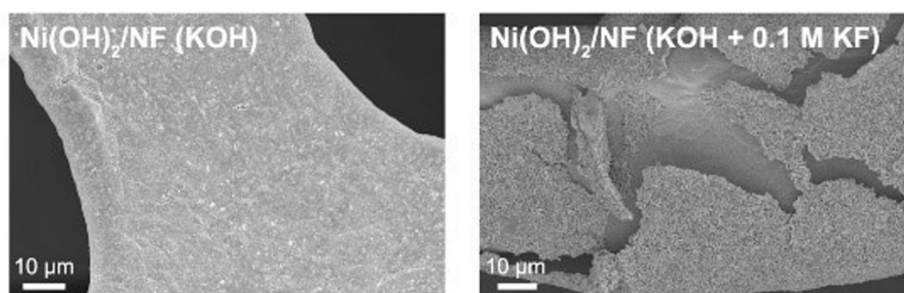

**Figure S13.** SEM images of Ni(OH)<sub>2</sub>/NF after the CP test at a fixed current density of 20 mA cm<sup>-2</sup> for 1 h.

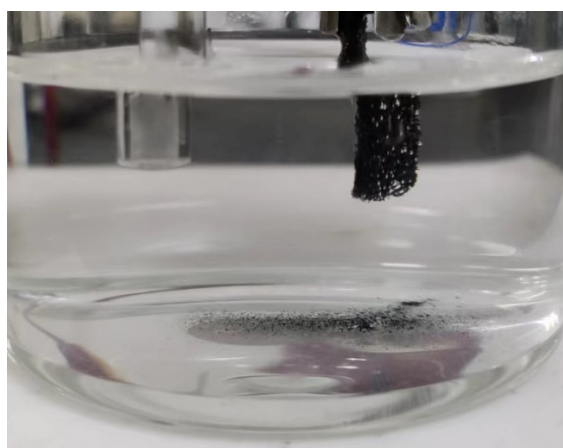

**Figure S14.** Physical photo of the NH<sub>4</sub>NiF<sub>3</sub>/NF-AO electrode after CP stability test.

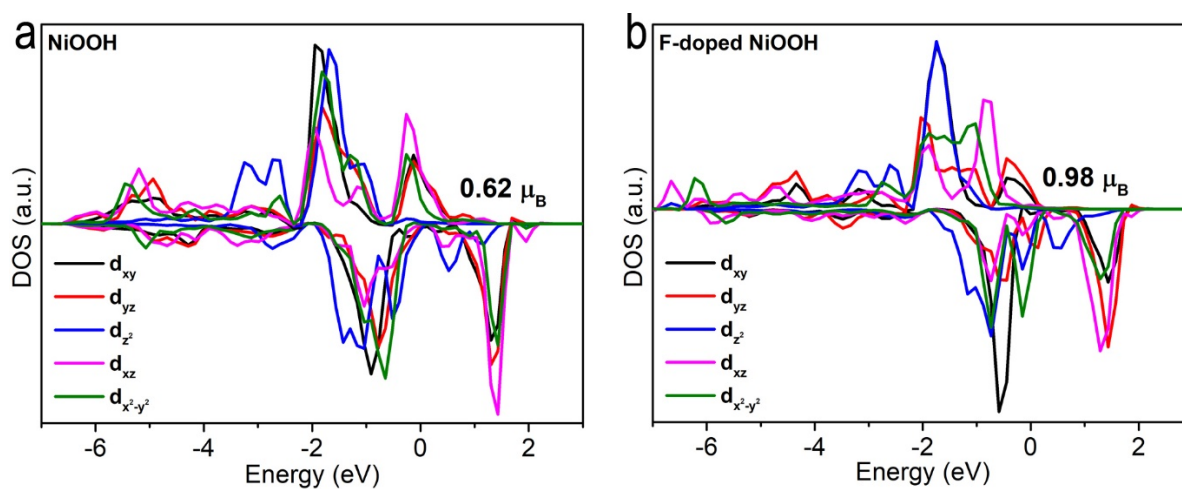

**Figure S15.** DOS for Ni-3d orbitals in (a) NiOOH and (b) F-doped NiOOH models.

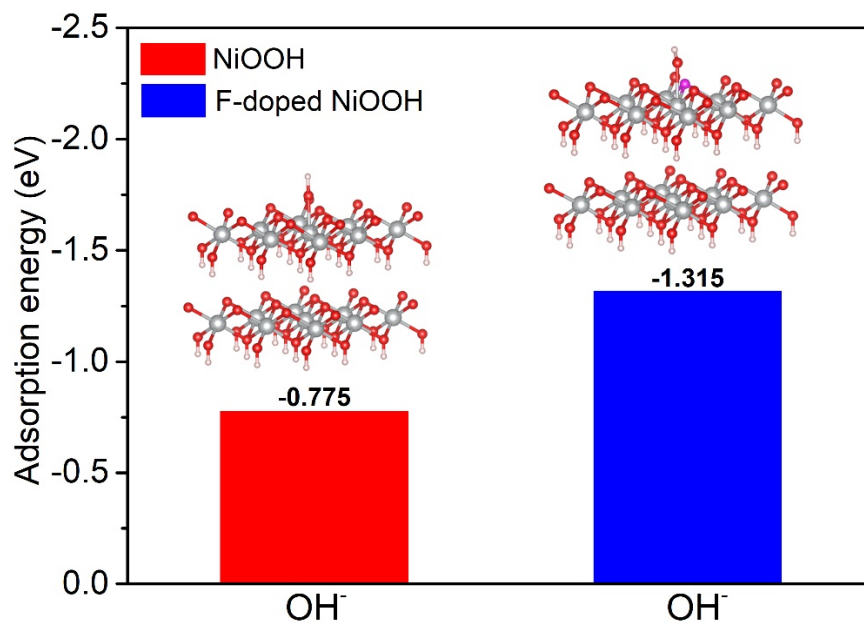

**Figure S16.** Calculated adsorption energies of OH<sup>-</sup> on NiOOH and F-doped NiOOH models, respectively.



**Table S1.** Comparison of OER activity and stability of the as-synthesized F-doped  $\gamma$ -NiOOH with other Fe-free Ni(Co)OOH-based electrocatalysts reported in the literature.

| Catalyst                                                                                   | Substrate          | Electrolyte | Overpotential at 10 mA cm <sup>-2</sup> (mV) | Tafel slope (mV dec <sup>-1</sup> ) | Stability test                 | Reference |
|--------------------------------------------------------------------------------------------|--------------------|-------------|----------------------------------------------|-------------------------------------|--------------------------------|-----------|
| <b>F-doped <math>\gamma</math>-NiOOH</b>                                                   | Ni foam            | 1 M KOH     | 240                                          | 59.5                                | 300 h@200 mA cm <sup>-2</sup>  | This work |
| NiOOH-NiCr <sub>2</sub> O <sub>4</sub>                                                     | Ni foam            | 1 M KOH     | 271 (at 20 mA cm <sup>-2</sup> )             | 104                                 | 30 h@1.6 V                     | 1         |
| F-CoMoO <sub>4-x</sub> -2                                                                  | graphite felt      | 1 M KOH     | 256                                          | 64.4                                | 20 h@1.54 V                    | 2         |
| F-CoO                                                                                      | carbon cloth       | 1 M KOH     | 238                                          | 68                                  | 60 h@10 mA cm <sup>-2</sup>    | 3         |
| NiPS <sub>3</sub> @NiOOH                                                                   | glassy carbon      | 0.1 M KOH   | 350                                          | 80                                  | 160 h@10 mA cm <sup>-2</sup>   | 4         |
| F-NiAl LDH                                                                                 | Ni foam            | 1 M KOH     | 250                                          | 77                                  | 12 h@30 mA cm <sup>-2</sup>    | 5         |
| Mo-NiOOH                                                                                   | Ni foam            | 1 M KOH     | 310                                          | 68                                  | 100 h@10 mA cm <sup>-2</sup>   | 6         |
| F-NiOOH/Ni(OH) <sub>2</sub>                                                                | Ni foam            | 1 M KOH     | 268                                          | 39                                  | 100 h@100 mA cm <sup>-2</sup>  | 7         |
| F-CoOOH                                                                                    | Ni foam            | 1 M KOH     | 270                                          | 54                                  | 30 h@10 mA cm <sup>-2</sup>    | 8         |
| F-doped $\alpha$ -Ni(OH) <sub>2</sub>                                                      | glassy carbon      | 1 M KOH     | 325                                          | 31.89                               | 30 h@25 mA cm <sup>-2</sup>    | 9         |
| Co <sub>4</sub> S <sub>3</sub> /Ni <sub>x</sub> S <sub>6</sub> (7 $\geq$ x $\geq$ 6)/NiOOH | glassy carbon      | 1 M KOH     | 362                                          | 37                                  | LSV cycling test of 200 cycles | 10        |
| NiCo <sub>2</sub> O <sub>4</sub> /NiO/CoF <sub>2</sub> @mC700                              | glassy carbon      | 1 M KOH     | 240                                          | 78                                  | 40 h@1.47 V                    | 11        |
| NiCoSe <sub>2</sub> @NiOOH/CoOOH                                                           | carbon cloth       | 1 M KOH     | 354                                          | -                                   | cycling for 100 h              | 12        |
| FN-CoP NS                                                                                  | carbon cloth       | 1 M KOH     | 241                                          | 69.6                                | 48 h@1.45 V                    | 13        |
| NiOOH@CuO-Cu <sub>2</sub> O/Co(OH) <sub>2</sub>                                            | Ni foam            | 1 M KOH     | 262 (at 20 mA cm <sup>-2</sup> )             | 68                                  | 15 h@50 mA cm <sup>-2</sup>    | 14        |
| Ni(OH) <sub>2</sub> /NiOOH                                                                 | Ni foam            | 1 M KOH     | 256                                          | 41                                  | 10 h@200 mA cm <sup>-2</sup>   | 15        |
| V-Ni <sub>3</sub> S <sub>2</sub> @NiOOH                                                    | Ni foam            | 1 M KOH     | 348 (at 20 mA cm <sup>-2</sup> )             | 99                                  | 10 h@100 mA cm <sup>-2</sup>   | 16        |
| Ni <sub>x</sub> Co <sub>1-x</sub> OOH                                                      | Ti foil            | 1 M KOH     | 350                                          | 41                                  | 24 h@10 mA cm <sup>-2</sup>    | 17        |
| $\gamma$ -NiOOH                                                                            | Ni foam            | 1 M KOH     | 244                                          | 44.8                                | 30 h@10 mA cm <sup>-2</sup>    | 18        |
| Co(OH)(CO <sub>3</sub> ) <sub>0.5</sub>                                                    | Ni foam            | 1 M KOH     | 259                                          | 84.6                                | 30 h@1.71 V                    | 19        |
| Se-NiS <sub>2</sub>                                                                        | carbon cloth       | 1 M KOH     | 343 (at 50 mA cm <sup>-2</sup> )             | 140                                 | 30 h@100 mA cm <sup>-2</sup>   | 20        |
| Cu <sub>50</sub> Ni <sub>50</sub> NP                                                       | glassy carbon      | 1 M KOH     | 318                                          | 63.9                                | 20 h@10 mA cm <sup>-2</sup>    | 21        |
| Ni <sub>2</sub> P-CoCH                                                                     | carbon fiber paper | 1 M KOH     | 270                                          | 36                                  | 4 h@20 mA cm <sup>-2</sup>     | 22        |
| CoS <sub>1.97</sub> -CeO <sub>2</sub>                                                      | carbon fiber paper | 1 M KOH     | 264                                          | 49                                  | 50 h@10 mA cm <sup>-2</sup>    | 23        |
| Ce-CoP                                                                                     | carbon cloth       | 1 M KOH     | 240                                          | 50.39                               | 30 h@10 mA cm <sup>-2</sup>    | 24        |
| CoOOH/Co <sub>9</sub> S <sub>8</sub>                                                       | carbon cloth       | 1 M KOH     | 240                                          | 86.4                                | 160 h@100 mA cm <sup>-2</sup>  | 25        |

|                                                      |               |         |                                   |      |                              |    |
|------------------------------------------------------|---------------|---------|-----------------------------------|------|------------------------------|----|
| <b>Co<sub>1-x</sub>S/Co(OH)F</b>                     | carbon cloth  | 1 M KOH | 269                               | 71   | 20 h@60 mA cm <sup>-2</sup>  | 26 |
| <b>NiSe<sub>2</sub>/Ni<sub>3</sub>Se<sub>4</sub></b> | Ni foam       | 1 M KOH | 309 (at 100 mA cm <sup>-2</sup> ) | 71.9 | 60 h@1.518 V                 | 27 |
| <b>Hy-Ni-CoP/Co<sub>2</sub>P@NC</b>                  | glassy carbon | 1 M KOH | 272                               | 69   | 50 h@~12 mA cm <sup>-2</sup> | 28 |
| <b>Ni<sub>2</sub>Cr<sub>1</sub>-LDH</b>              | Ni foam       | 1 M KOH | 319 (at 100 mA cm <sup>-2</sup> ) | 22.9 | 30 h@1.55 V                  | 29 |
| <b>Co<sub>2</sub>P@Co<sub>3</sub>O<sub>4</sub></b>   | glassy carbon | 1 M KOH | 393                               | 60   | 8 h@10 mA cm <sup>-2</sup>   | 30 |

**Table S2.** EIS fitting parameters of NH<sub>4</sub>NiF<sub>3</sub>/NF-AO and Ni(OH)<sub>2</sub>/NF.

| <b>Sample</b>                              | <b>R<sub>s</sub></b> | <b>R<sub>ct</sub></b> | <b>n</b> | <b>CPE</b> |
|--------------------------------------------|----------------------|-----------------------|----------|------------|
| <b>NH<sub>4</sub>NiF<sub>3</sub>/NF-AO</b> | 1.38                 | 0.74                  | 0.65     | 3.74       |
| <b>Ni(OH)<sub>2</sub>/NF</b>               | 1.47                 | 4.51                  | 0.73     | 0.21       |

**Table S3.** Structural parameters of NiOOH and F-doped NiOOH models.

| NiOOH:        |            |            |  | F-doped NiOOH: |            |            |  |
|---------------|------------|------------|--|----------------|------------|------------|--|
| Bond          | Population | Length (Å) |  | Bond           | Population | Length (Å) |  |
| O 22 -- Ni 14 | 0.25       | 1.92495    |  | O 12 -- Ni 13  | 0.26       | 1.90292    |  |
| O 6 -- Ni 10  | 0.25       | 1.92563    |  | O 8 -- Ni 11   | 0.26       | 1.90320    |  |
| O 22 -- Ni 18 | 0.25       | 1.92660    |  | O 24 -- Ni 13  | 0.26       | 1.90332    |  |
| O 34 -- Ni 6  | 0.25       | 1.92750    |  | O 32 -- Ni 17  | 0.26       | 1.90620    |  |
| O 6 -- Ni 4   | 0.25       | 1.92769    |  | O 4 -- Ni 11   | 0.26       | 1.90778    |  |
| O 21 -- Ni 17 | 0.26       | 1.92858    |  | O 16 -- Ni 17  | 0.26       | 1.90977    |  |
| O 2 -- Ni 2   | 0.25       | 1.92875    |  | O 32 -- Ni 1   | 0.27       | 1.90979    |  |
| O 34 -- Ni 18 | 0.25       | 1.92891    |  | O 12 -- Ni 7   | 0.27       | 1.91081    |  |
| O 33 -- Ni 17 | 0.26       | 1.92968    |  | O 8 -- Ni 7    | 0.27       | 1.91137    |  |
| O 2 -- Ni 10  | 0.25       | 1.92986    |  | O 24 -- Ni 1   | 0.27       | 1.91282    |  |
| O 17 -- Ni 9  | 0.26       | 1.93003    |  | O 29 -- Ni 4   | 0.26       | 1.91350    |  |
| O 26 -- Ni 14 | 0.25       | 1.93030    |  | O 1 -- Ni 2    | 0.26       | 1.91483    |  |
| O 1 -- Ni 9   | 0.26       | 1.93032    |  | O 16 -- Ni 9   | 0.27       | 1.91579    |  |
| O 2 -- Ni 8   | 0.25       | 1.93033    |  | O 4 -- Ni 9    | 0.27       | 1.91671    |  |
| O 26 -- Ni 4  | 0.25       | 1.93051    |  | O 5 -- Ni 4    | 0.25       | 1.92108    |  |
| O 17 -- Ni 17 | 0.26       | 1.93067    |  | O 1 -- Ni 10   | 0.26       | 1.92115    |  |
| O 25 -- Ni 1  | 0.26       | 1.93069    |  | O 5 -- Ni 12   | 0.26       | 1.92121    |  |
| O 29 -- Ni 5  | 0.26       | 1.93119    |  | O 28 -- Ni 15  | 0.26       | 1.92194    |  |
| O 34 -- Ni 2  | 0.25       | 1.93175    |  | O 22 -- Ni 17  | 0.24       | 1.92283    |  |
| O 13 -- Ni 15 | 0.25       | 1.93195    |  | O 13 -- Ni 14  | 0.26       | 1.92303    |  |
| O 13 -- Ni 7  | 0.26       | 1.93197    |  | O 28 -- Ni 5   | 0.26       | 1.92336    |  |
| O 5 -- Ni 9   | 0.26       | 1.93235    |  | O 22 -- Ni 11  | 0.24       | 1.92458    |  |
| O 5 -- Ni 3   | 0.26       | 1.93271    |  | O 9 -- Ni 6    | 0.26       | 1.92601    |  |
| O 1 -- Ni 1   | 0.26       | 1.93327    |  | O 26 -- Ni 13  | 0.24       | 1.92886    |  |
| O 29 -- Ni 15 | 0.26       | 1.93328    |  | O 29 -- Ni 6   | 0.25       | 1.92886    |  |
| O 17 -- Ni 15 | 0.25       | 1.93424    |  | O 28 -- Ni 3   | 0.26       | 1.92912    |  |
| O 22 -- Ni 12 | 0.25       | 1.93475    |  | O 14 -- Ni 13  | 0.24       | 1.92973    |  |
| O 25 -- Ni 13 | 0.26       | 1.93487    |  | O 26 -- Ni 17  | 0.24       | 1.93013    |  |
| O 5 -- Ni 11  | 0.26       | 1.93496    |  | O 14 -- Ni 11  | 0.24       | 1.93099    |  |
| O 21 -- Ni 13 | 0.26       | 1.93511    |  | O 13 -- Ni 8   | 0.26       | 1.93100    |  |
| O 25 -- Ni 3  | 0.26       | 1.93515    |  | O 20 -- Ni 13  | 0.25       | 1.93104    |  |
| O 21 -- Ni 11 | 0.26       | 1.93524    |  | O 9 -- Ni 12   | 0.26       | 1.93165    |  |
| O 33 -- Ni 1  | 0.26       | 1.93546    |  | O 5 -- Ni 10   | 0.26       | 1.93203    |  |
| O 26 -- Ni 2  | 0.25       | 1.93600    |  | O 13 -- Ni 16  | 0.26       | 1.93344    |  |
| O 9 -- Ni 11  | 0.26       | 1.93662    |  | O 20 -- Ni 17  | 0.25       | 1.93695    |  |
| O 6 -- Ni 12  | 0.25       | 1.93683    |  | O 29 -- Ni 16  | 0.25       | 1.93803    |  |
| O 33 -- Ni 5  | 0.26       | 1.93720    |  | O 20 -- Ni 11  | 0.25       | 1.93930    |  |
| O 9 -- Ni 5   | 0.26       | 1.93758    |  | O 9 -- Ni 8    | 0.26       | 1.94202    |  |
| O 3 -- Ni 1   | 0.23       | 1.93811    |  | O 21 -- Ni 18  | 0.23       | 1.94325    |  |
| O 1 -- Ni 7   | 0.26       | 1.93815    |  | O 1 -- Ni 8    | 0.25       | 1.94343    |  |
| O 9 -- Ni 7   | 0.26       | 1.93903    |  | O 17 -- Ni 18  | 0.22       | 1.94799    |  |
| O 29 -- Ni 3  | 0.26       | 1.94091    |  | O 25 -- Ni 14  | 0.23       | 1.94888    |  |
| O 13 -- Ni 13 | 0.26       | 1.94096    |  | O 17 -- Ni 16  | 0.23       | 1.94957    |  |
| O 30 -- Ni 16 | 0.23       | 1.94451    |  | O 33 -- Ni 2   | 0.23       | 1.95019    |  |
| O 14 -- Ni 16 | 0.23       | 1.94494    |  | O 30 -- Ni 3   | 0.23       | 1.95136    |  |
| O 23 -- Ni 17 | 0.23       | 1.94538    |  | O 4 -- Ni 3    | 0.26       | 1.95169    |  |
| O 23 -- Ni 9  | 0.23       | 1.94567    |  | O 16 -- Ni 15  | 0.25       | 1.95221    |  |
| O 19 -- Ni 9  | 0.23       | 1.94644    |  | O 30 -- Ni 15  | 0.23       | 1.95227    |  |
| O 35 -- Ni 17 | 0.23       | 1.94815    |  | O 30 -- Ni 13  | 0.23       | 1.95338    |  |
| O 19 -- Ni 15 | 0.23       | 1.94919    |  | O 32 -- Ni 5   | 0.25       | 1.95365    |  |
| O 3 -- Ni 5   | 0.23       | 1.95034    |  | O 25 -- Ni 1   | 0.21       | 1.95462    |  |
| O 3 -- Ni 7   | 0.23       | 1.95139    |  | O 8 -- Ni 5    | 0.25       | 1.95481    |  |
| O 35 -- Ni 15 | 0.23       | 1.95142    |  | O 14 -- Ni 7   | 0.21       | 1.95495    |  |
| O 23 -- Ni 11 | 0.23       | 1.95196    |  | O 24 -- Ni 3   | 0.25       | 1.95516    |  |
| O 10 -- Ni 6  | 0.22       | 1.95242    |  | O 22 -- Ni 9   | 0.21       | 1.95543    |  |
| O 14 -- Ni 8  | 0.23       | 1.95262    |  | O 33 -- Ni 6   | 0.22       | 1.95616    |  |
| O 18 -- Ni 16 | 0.22       | 1.95459    |  | O 33 -- Ni 18  | 0.21       | 1.95847    |  |
| O 10 -- Ni 8  | 0.22       | 1.95496    |  | O 21 -- Ni 14  | 0.22       | 1.95978    |  |
| O 30 -- Ni 6  | 0.22       | 1.95530    |  | O 12 -- Ni 15  | 0.25       | 1.96079    |  |
| O 35 -- Ni 5  | 0.23       | 1.95705    |  | O 21 -- Ni 12  | 0.22       | 1.96150    |  |
| O 18 -- Ni 18 | 0.22       | 1.95817    |  | O 25 -- Ni 2   | 0.22       | 1.96452    |  |
| O 19 -- Ni 7  | 0.22       | 1.95863    |  | O 25 -- Ni 4   | 0.22       | 1.96572    |  |
| O 18 -- Ni 10 | 0.22       | 1.96213    |  | O 2 -- Ni 5    | 0.20       | 1.97155    |  |
| O 15 -- Ni 13 | 0.21       | 1.96387    |  | O 18 -- Ni 7   | 0.21       | 1.97259    |  |
| O 31 -- Ni 3  | 0.21       | 1.96417    |  | O 17 -- Ni 10  | 0.21       | 1.97323    |  |
| O 10 -- Ni 12 | 0.23       | 1.96454    |  | O 6 -- Ni 1    | 0.21       | 1.97358    |  |
| O 11 -- Ni 3  | 0.21       | 1.96483    |  | O 18 -- Ni 15  | 0.20       | 1.97405    |  |
| O 30 -- Ni 4  | 0.23       | 1.96559    |  | O 10 -- Ni 5   | 0.20       | 1.97732    |  |
| O 31 -- Ni 13 | 0.21       | 1.96892    |  | O 34 -- Ni 5   | 0.20       | 1.97762    |  |
| O 14 -- Ni 14 | 0.22       | 1.96949    |  | O 2 -- Ni 1    | 0.21       | 1.97796    |  |
| O 11 -- Ni 11 | 0.20       | 1.97204    |  | O 2 -- Ni 7    | 0.21       | 1.97862    |  |
| O 27 -- Ni 1  | 0.20       | 1.97263    |  | O 34 -- Ni 17  | 0.20       | 1.97930    |  |
| O 7 -- Ni 9   | 0.20       | 1.97279    |  | O 6 -- Ni 3    | 0.20       | 1.98137    |  |
| O 15 -- Ni 11 | 0.20       | 1.97374    |  | O 6 -- Ni 9    | 0.21       | 1.98180    |  |
| O 7 -- Ni 1   | 0.20       | 1.97382    |  | O 10 -- Ni 11  | 0.20       | 1.98324    |  |
| O 27 -- Ni 17 | 0.20       | 1.97466    |  | O 18 -- Ni 9   | 0.21       | 1.98340    |  |
| O 7 -- Ni 3   | 0.21       | 1.97483    |  | O 10 -- Ni 3   | 0.20       | 1.98776    |  |
| O 27 -- Ni 13 | 0.21       | 1.97568    |  | O 34 -- Ni 15  | 0.20       | 1.98830    |  |
| O 31 -- Ni 15 | 0.20       | 1.98136    |  | O 7 -- Ni 4    | 0.20       | 2.00466    |  |
| O 15 -- Ni 7  | 0.21       | 1.98200    |  | O 35 -- Ni 18  | 0.19       | 2.00837    |  |
| O 11 -- Ni 5  | 0.20       | 1.98324    |  | O 15 -- Ni 14  | 0.19       | 2.01200    |  |
| O 20 -- Ni 16 | 0.18       | 2.01529    |  | O 27 -- Ni 18  | 0.19       | 2.01471    |  |
| O 36 -- Ni 16 | 0.18       | 2.01894    |  | O 31 -- Ni 16  | 0.18       | 2.01782    |  |
| O 12 -- Ni 6  | 0.19       | 2.02088    |  | O 15 -- Ni 12  | 0.19       | 2.01789    |  |
| O 32 -- Ni 16 | 0.19       | 2.02099    |  | O 7 -- Ni 2    | 0.19       | 2.01854    |  |
| O 32 -- Ni 14 | 0.18       | 2.02488    |  | O 31 -- Ni 4   | 0.18       | 2.01905    |  |
| O 4 -- Ni 8   | 0.19       | 2.02545    |  | O 27 -- Ni 2   | 0.18       | 2.02054    |  |
| O 24 -- Ni 10 | 0.18       | 2.02561    |  | O 23 -- Ni 10  | 0.18       | 2.02180    |  |
| O 28 -- Ni 2  | 0.18       | 2.02567    |  | O 23 -- Ni 18  | 0.19       | 2.02650    |  |
| O 20 -- Ni 10 | 0.18       | 2.02578    |  | O 3 -- Ni 6    | 0.18       | 2.02833    |  |
| O 16 -- Ni 14 | 0.18       | 2.02626    |  | O 11 -- Ni 6   | 0.18       | 2.02939    |  |
| O 16 -- Ni 8  | 0.19       | 2.02629    |  | O 35 -- Ni 6   | 0.18       | 2.03046    |  |
| O 24 -- Ni 18 | 0.18       | 2.02695    |  | O 19 -- Ni 10  | 0.19       | 2.03048    |  |
| O 4 -- Ni 6   | 0.18       | 2.02712    |  | O 3 -- Ni 8    | 0.18       | 2.03141    |  |
| O 36 -- Ni 6  | 0.18       | 2.02743    |  | O 27 -- Ni 14  | 0.17       | 2.03257    |  |
| O 28 -- Ni 18 | 0.18       | 2.02792    |  | O 11 -- Ni 4   | 0.18       | 2.03309    |  |
| O 8 -- Ni 2   | 0.18       | 2.02897    |  | O 31 -- Ni 14  | 0.17       | 2.03776    |  |
| O 36 -- Ni 18 | 0.18       | 2.02911    |  | O 23 -- Ni 12  | 0.17       | 2.03814    |  |
| O 20 -- Ni 8  | 0.18       | 2.02953    |  | O 11 -- Ni 12  | 0.17       | 2.03874    |  |
| O 12 -- Ni 4  | 0.18       | 2.03127    |  | O 3 -- Ni 2    | 0.18       | 2.03993    |  |
| O 32 -- Ni 4  | 0.18       | 2.03232    |  | O 19 -- Ni 16  | 0.18       | 2.04025    |  |
| O 8 -- Ni 10  | 0.18       | 2.03313    |  | O 19 -- Ni 8   | 0.18       | 2.04139    |  |
| O 4 -- Ni 2   | 0.18       | 2.03577    |  | O 35 -- Ni 16  | 0.17       | 2.04766    |  |
| O 24 -- Ni 12 | 0.18       | 2.03708    |  | F 1 -- Ni 1    | 0.15       | 2.04837    |  |
| O 12 -- Ni 12 | 0.18       | 2.03755    |  | F 1 -- Ni 9    | 0.15       | 2.05004    |  |
| O 8 -- Ni 4   | 0.18       | 2.03813    |  | F 1 -- Ni 7    | 0.14       | 2.05463    |  |
| O 16 -- Ni 12 | 0.18       | 2.03924    |  | O 7 -- Ni 10   | 0.16       | 2.05626    |  |
| O 28 -- Ni 14 | 0.17       | 2.04592    |  | O 15 -- Ni 8   | 0.16       | 2.05832    |  |

## References

- [1] J. Zhao, X. Ren, Q. Han, D. Fan, X. Sun, X. Kuang, Q. Wei, D. Wu, Ultra-thin wrinkled NiOOH–NiCr<sub>2</sub>O<sub>4</sub> nanosheets on Ni foam: an advanced catalytic electrode for oxygen evolution reaction. *Chem. Commun.* **2018**, *54*, 4987-4990.
- [2] W. Xie, J. Huang, L. Huang, S. Geng, S. Song, P. Tsiakaras, Y. Wang, Novel fluorine-doped cobalt molybdate nanosheets with enriched oxygen-vacancies for improved oxygen evolution reaction activity. *Appl. Catal. B-Environ.* **2022**, *303*, 120871.
- [3] C. Zhong, Z. Han, T. Wang, Q. Wang, Z. Shen, Q. Zhou, J. Wang, S. Zhang, X. Jin, S. Li, P. Wang, D. Gao, Y. Zhou, H. Zhang, Aliovalent fluorine doping and anodization-induced amorphization enable bifunctional catalysts for efficient water splitting. *J. Mater. Chem. A* **2020**, *8*, 10831-10838.
- [4] B. Konkena, J. Masa, A. J. R. Botz, I. Sinev, W. Xia, J. Koßmann, R. Drautz, M. Muhler, W. Schuhmann, Metallic NiPS<sub>3</sub>@NiOOH Core–Shell Heterostructures as Highly Efficient and Stable Electrocatalyst for the Oxygen Evolution Reaction. *ACS Catal.* **2017**, *7*, 229-237.
- [5] Y. Tong, H. Mao, P. Chen, Q. Sun, F. Yan, F. Xi, Confinement of fluorine anions in nickel-based catalysts for greatly enhancing oxygen evolution activity. *Chem. Commun.* **2020**, *56*, 4196-4199.
- [6] Y. Jin, S. Huang, X. Yue, C. Shu, P. K. Shen, Highly stable and efficient non-precious metal electrocatalysts of Mo-doped NiOOH nanosheets for oxygen evolution reaction. *Int. J. Hydrog. Energy* **2018**, *43*, 12140-12145.
- [7] J. Wang, L. A. Zhang, Y. Ren, P. Wang, Fluorine-doped nickel oxyhydroxide as a robust electrocatalyst for oxygen evolution reaction. *Electrochim. Acta* **2023**, *437*, 141475.
- [8] P. Chen, T. Zhou, S. Wang, N. Zhang, Y. Tong, H. Ju, W. Chu, C. Wu, Y. Xie, Dynamic Migration of Surface Fluorine Anions on Cobalt-Based Materials to Achieve Enhanced Oxygen Evolution Catalysis. *Angew. Chem. Int. Ed.* **2018**, *57*, 15471-15475.

- [9] N. Hussain, W. Yang, J. Dou, Y. Chen, Y. Qian, L. Xu, Ultrathin mesoporous F-doped  $\alpha$ -Ni(OH)<sub>2</sub> nanosheets as an efficient electrode material for water splitting and supercapacitors. *J. Mater. Chem. A* **2019**, 7, 9656-9664.
- [10] X.-X. Ma, X.-Q. He, Co<sub>4</sub>S<sub>3</sub>/Ni<sub>x</sub>S<sub>6</sub>(7 ≥ x ≥ 6)/NiOOH in-situ encapsulated carbon-based hybrid as a high-efficient oxygen electrode catalyst in alkaline media. *Electrochim. Acta* **2016**, 213, 163-173.
- [11] S. Wu, J. Liu, B. Cui, Y. Li, Y. Liu, B. Hu, L. He, M. Wang, Z. Zhang, K. Tian, Y. Song, Fluorine-doped nickel cobalt oxide spinel as efficiently bifunctional catalyst for overall water splitting. *Electrochim. Acta* **2019**, 299, 231-244.
- [12] M. Cui, X. Bai, J. Zhu, C. Han, Y. Huang, L. Kang, C. Zhi, H. Li, Electrochemically induced NiCoSe<sub>2</sub>@NiOOH/CoOOH heterostructures as multifunctional cathode materials for flexible hybrid zn batteries. *Energy Storage Mater.* **2021**, 36, 427-434.
- [13] D. Xu, J. Yao, X. Ma, Y. Xiao, C. Zhang, W. Lin, H. Gao, F, N neutralizing effect induced Co-P-O cleaving endows CoP nanosheets with superior HER and OER performances. *J. Colloid Interf. Sci.* **2022**, 619, 298-306.
- [14] Y. Li, G. Li, J. Xu, L. Jia, Novel CuO–Cu<sub>2</sub>O redox-induced self-assembly of hierarchical NiOOH@CuO–Cu<sub>2</sub>O/Co(OH)<sub>2</sub> nanocomposite for efficient oxygen evolution reaction. *Sustain. Energy Fuels* **2020**, 4, 869-877.
- [15] M. Lee, H.-S. Oh, M. K. Cho, J.-P. Ahn, Y. J. Hwang, B. K. Min, Activation of a Ni electrocatalyst through spontaneous transformation of nickel sulfide to nickel hydroxide in an oxygen evolution reaction. *Appl. Catal. B-Environ.* **2018**, 233, 130-135.
- [16] Y. Wang, J. Liu, Y. Liao, C. Wu, Y. Chen, Hetero-structured V-Ni<sub>3</sub>S<sub>2</sub>@NiOOH core-shell nanorods from an electrochemical anodization for water splitting. *J. Alloy. Compd.* **2021**, 856, 158219.

- [17] L.-a. Huang, Z. He, J. Guo, S.-e. Pei, H. Shao, J. Wang, Photodeposition fabrication of hierarchical layered Co-doped Ni oxyhydroxide ( $\text{Ni}_x\text{Co}_{1-x}\text{OOH}$ ) catalysts with enhanced electrocatalytic performance for oxygen evolution reaction. *Nano Res.* **2020**, *13*, 246-254.
- [18] K. Guo, H. Li, J. Huang, Y. Wang, Y. Peng, S. Lu, C. Xu, Selenization triggers deep reconstruction to produce ultrathin  $\gamma$ -NiOOH toward the efficient water oxidation. *J Energy Chem.* **2021**, *63*, 651-658.
- [19] R. Liang, B. Zhang, Y. Du, X. Han, S. Li, P. Xu, Understanding the Anion Effect of Basic Cobalt Salts for the Electrocatalytic Oxygen Evolution Reaction. *ACS Catal.* **2023**, *13*, 8821-8829.
- [20] M. Chen, Y. Zhang, R. Wang, B. Zhang, B. Song, Y. Guan, S. Li, P. Xu, Surface reconstruction of Se-doped  $\text{NiS}_2$  enables high-efficiency oxygen evolution reaction. *J Energy Chem.* **2023**, *84*, 173-180.
- [21] E. Gioria, S. Li, A. Mazheika, R. N. d'Alnoncourt, A. Thomas, F. Rosowski, CuNi Nanoalloys with Tunable Composition and Oxygen Defects for the Enhancement of the Oxygen Evolution Reaction. *Angew. Chem. Int. Ed.* **2023**, *62*, e202217888.
- [22] S. Zhang, C. Tan, R. Yan, X. Zou, F.-L. Hu, Y. Mi, C. Yan, S. Zhao, Constructing Built-in Electric Field in Heterogeneous Nanowire Arrays for Efficient Overall Water Electrolysis. *Angew. Chem. Int. Ed.* **2023**, *62*, e202302795.
- [23] T. Dai, X. Zhang, M. Sun, B. Huang, N. Zhang, P. Da, R. Yang, Z. He, W. Wang, P. Xi, C.-H. Yan, Uncovering the Promotion of  $\text{CeO}_2/\text{CoS}_{1.97}$  Heterostructure with Specific Spatial Architectures on Oxygen Evolution Reaction. *Adv. Mater.* **2021**, *33*, 2102593.
- [24] M. Li, X. Wang, K. Liu, Z. Zhu, H. Guo, M. Li, H. Du, D. Sun, H. Li, K. Huang, Y. Tang, G. Fu, Ce-Induced Differentiated Regulation of Co Sites via Gradient Orbital Coupling for Bifunctional Water-Splitting Reactions. *Adv. Energy Mater.* **2023**, 2301162.

- [25] N. Yao, G. Wang, H. Jia, J. Yin, H. Cong, S. Chen, W. Luo, Intermolecular Energy Gap-Induced Formation of High-Valent Cobalt Species in CoOOH Surface Layer on Cobalt Sulfides for Efficient Water Oxidation. *Angew. Chem. Int. Ed.* **2022**, *61*, e202117178.
- [26] Q. Lin, D. Guo, L. Zhou, L. Yang, H. Jin, J. Li, G. Fang, X. Chen, S. Wang, Tuning the Interface of  $\text{Co}_{1-x}\text{S}/\text{Co}(\text{OH})\text{F}$  by Atomic Replacement Strategy toward High-Performance Electrocatalytic Oxygen Evolution. *ACS Nano* **2022**, *16*, 15460-15470.
- [27] L. Tan, J. Yu, H. Wang, H. Gao, X. Liu, L. Wang, X. She, T. Zhan, Controllable synthesis and phase-dependent catalytic performance of dual-phase nickel selenides on Ni foam for overall water splitting. *Appl. Catal. B-Environ.* **2022**, *303*, 120915.
- [28] H. Chu, P. Feng, B. Jin, G. Ye, S. Cui, M. Zheng, G.-X. Zhang, M. Yang, In-situ release of phosphorus combined with rapid surface reconstruction for Co–Ni bimetallic phosphides boosting efficient overall water splitting. *Chem. Eng. J.* **2022**, *433*, 133523.
- [29] W. Ye, X. Fang, X. Chen, D. Yan, A three-dimensional nickel-chromium layered double hydroxide micro/nanosheet array as an efficient and stable bifunctional electrocatalyst for overall water splitting. *Nanoscale* **2018**, *10*, 19484-19491.
- [30] L. Yao, N. Zhang, Y. Wang, Y. Ni, D. Yan, C. Hu, Facile formation of 2D  $\text{Co}_2\text{P}@/\text{Co}_3\text{O}_4$  microsheets through in-situ topotactic conversion and surface corrosion: Bifunctional electrocatalysts towards overall water splitting. *J. Power Sources* **2018**, *374*, 142-148.
